# Supplementary material
Source: Springer Nature journal article supplement (https://www.springermedizin.de/resource/supplementary/12985_2010_1197_MOESM1_ESM.pdf/9610408)

**(A)**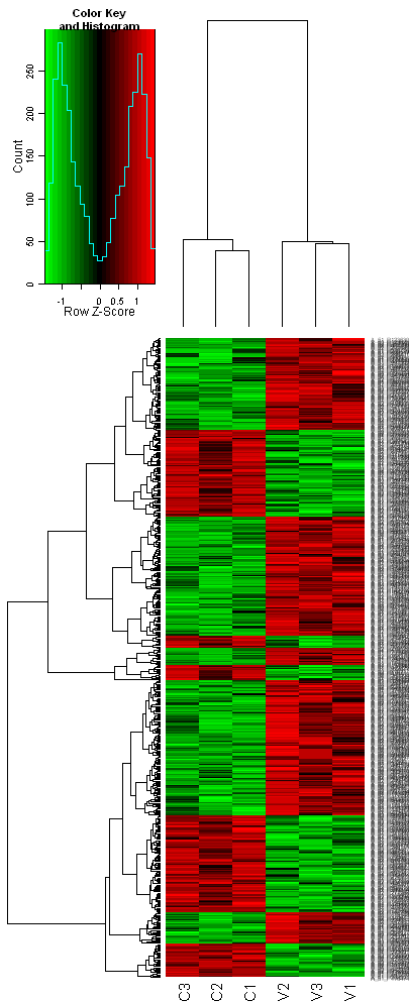**(B)**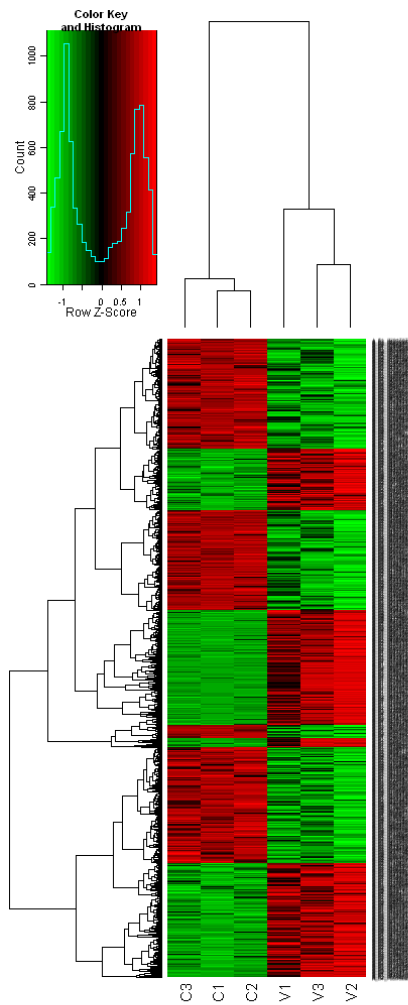

Supplement: MOESM1 [file 9610408]
